# Supplementary material
Source: PubMed Central journal article supplement (PMC3013278)

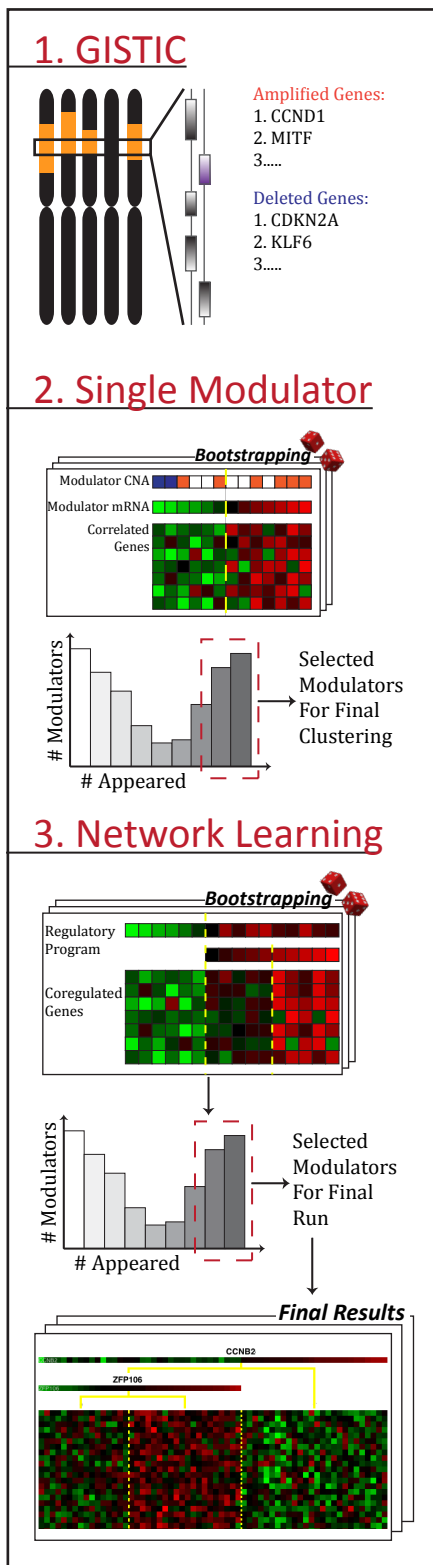

# Supplemental Figure 2

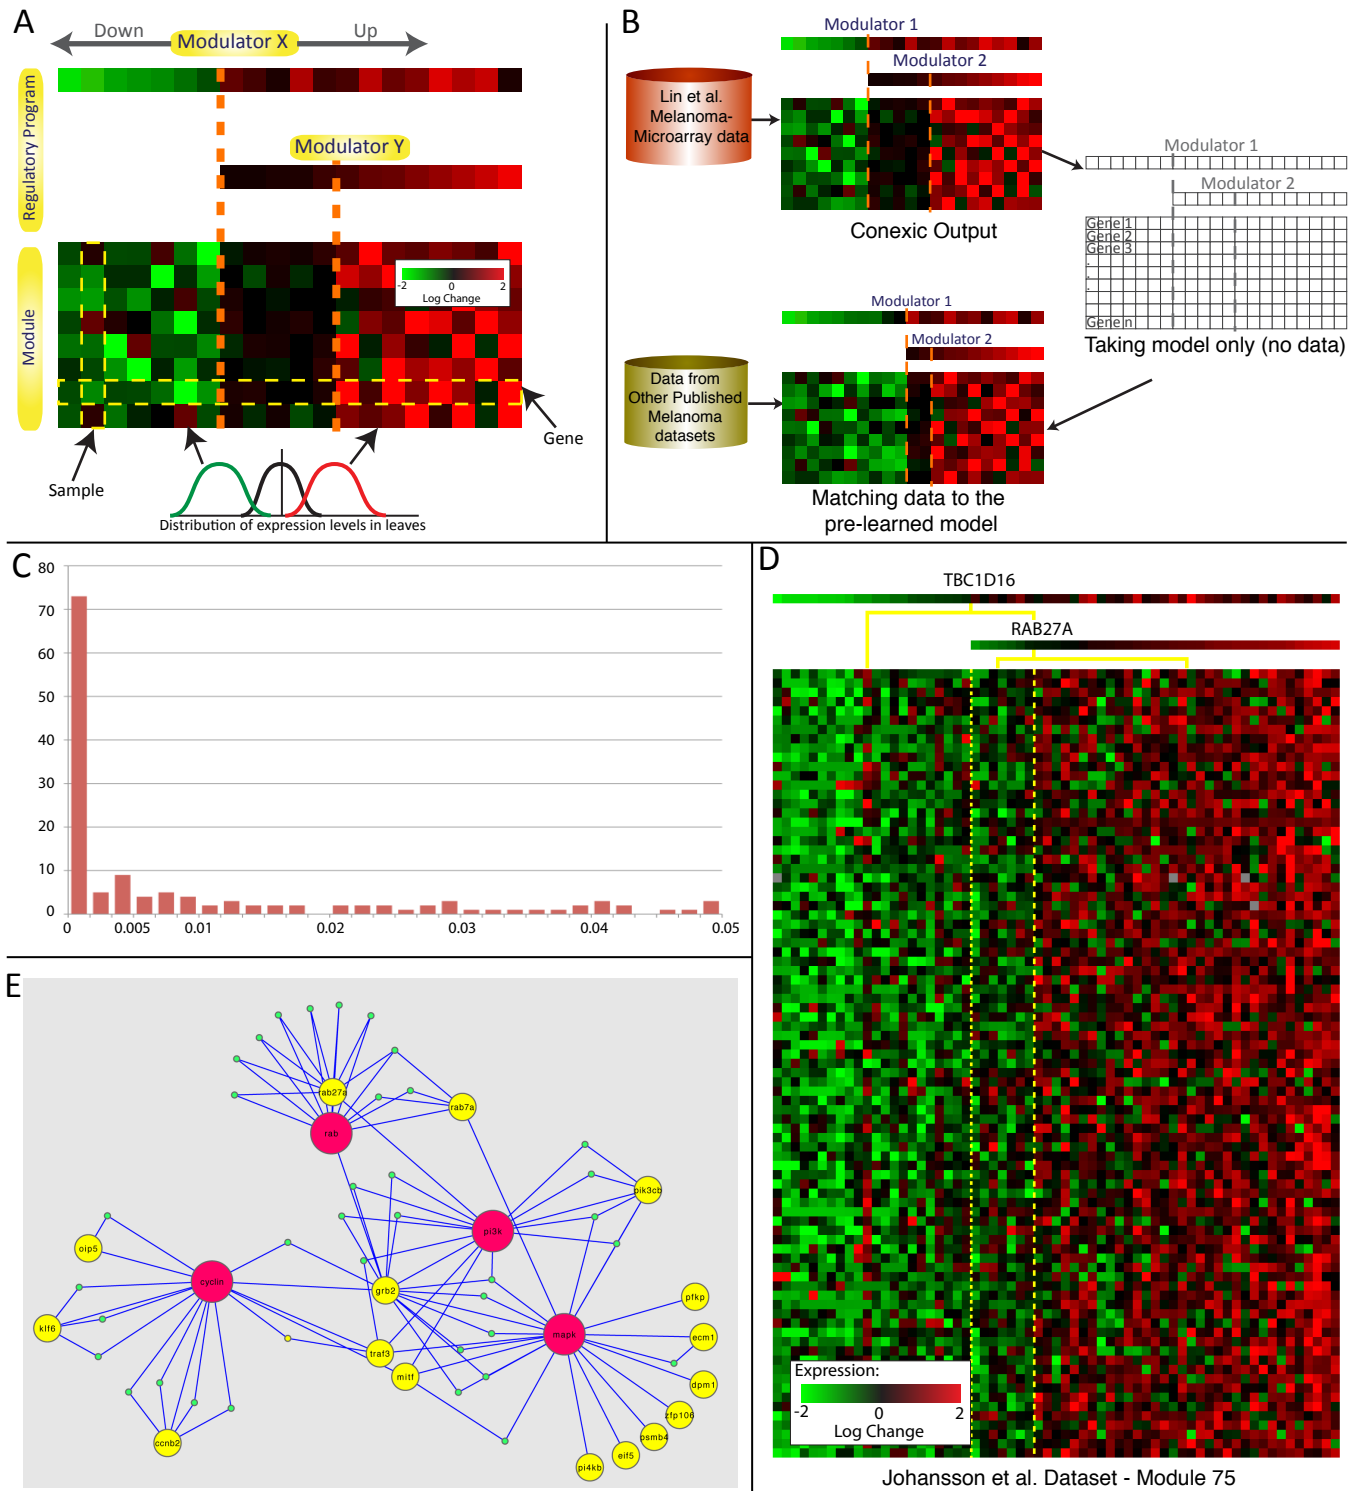

Supplemental Figure 3

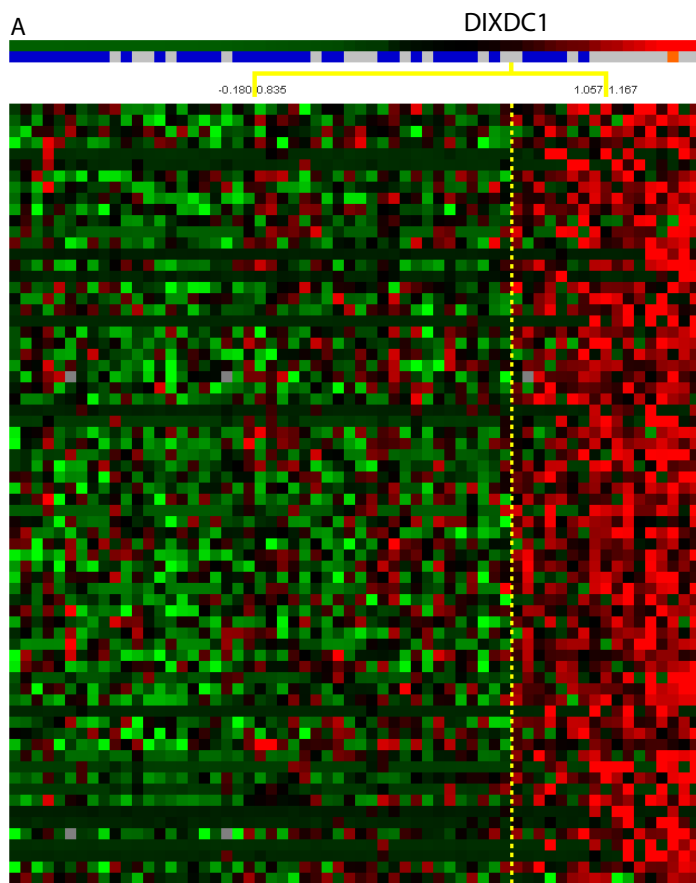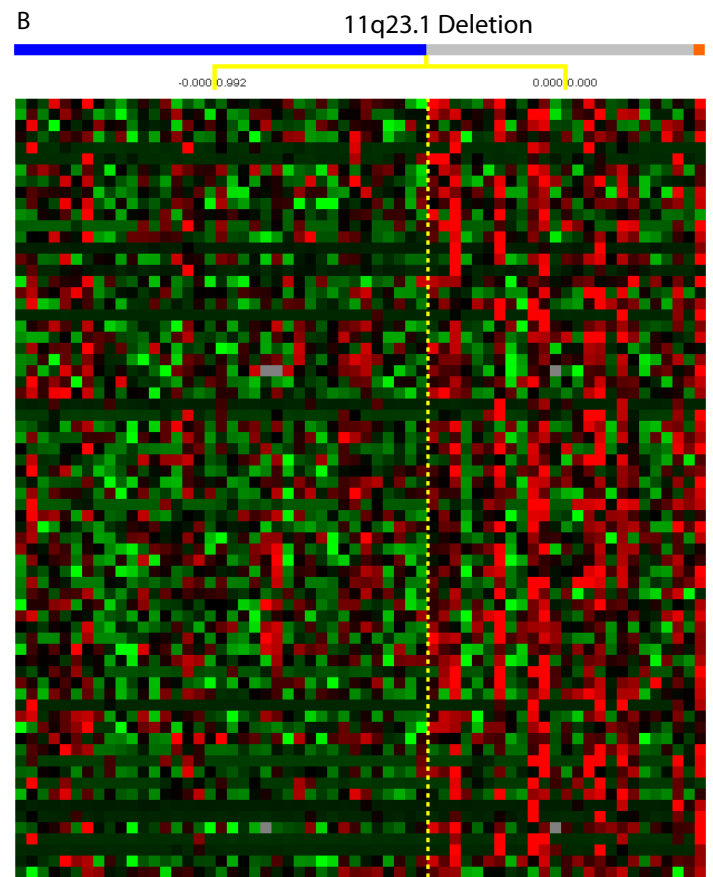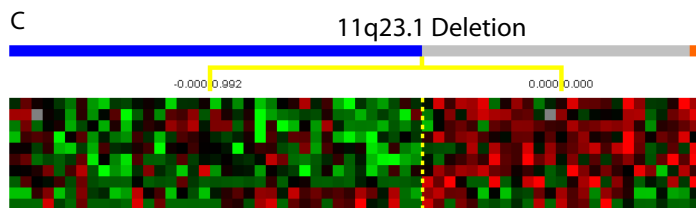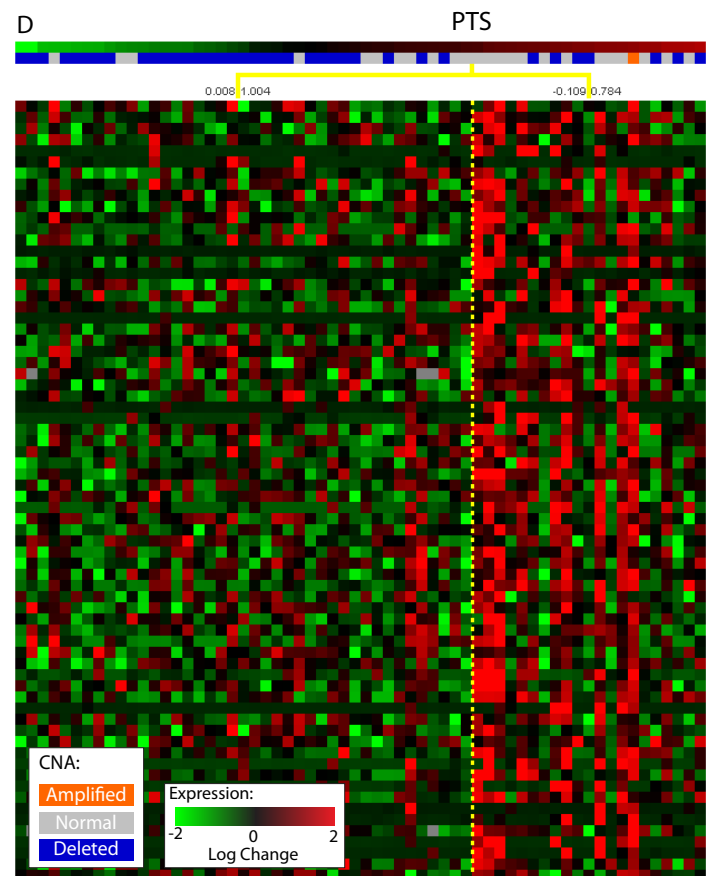

**E**

| Regulator        | NormalGamma | P-value |
|------------------|-------------|---------|
| 11q23.1 Deletion | -5,951.6    | 0.2888  |
| PTS              | -5,769.4    | 0.0013  |
| DIXDC1           | -5,307.4    | 0       |



A

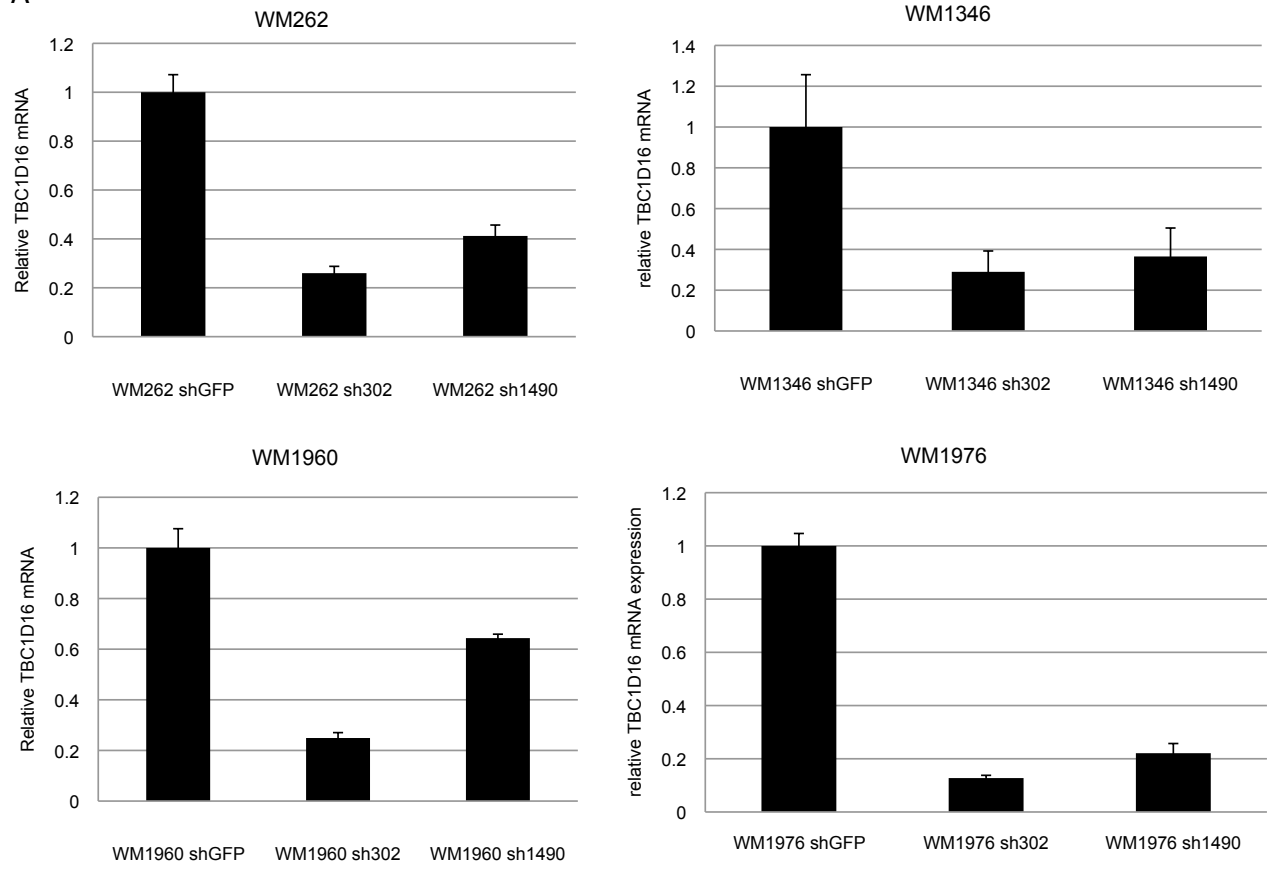

B

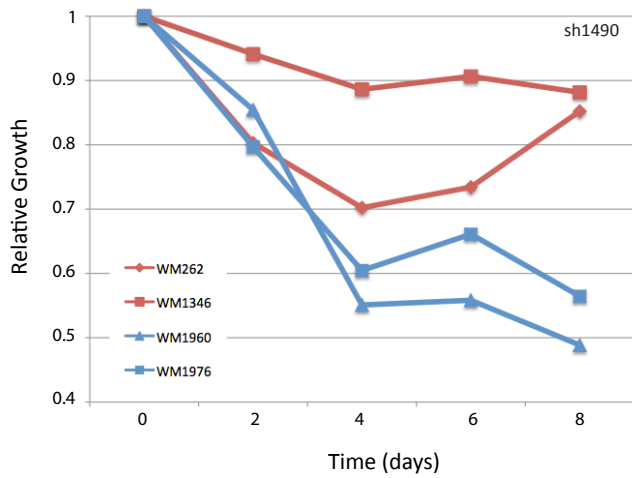

C

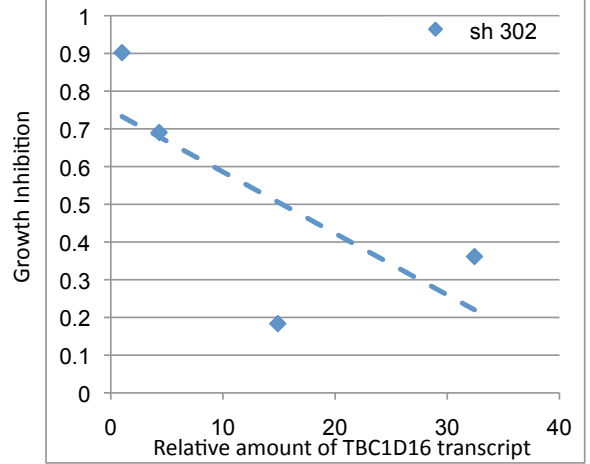

A

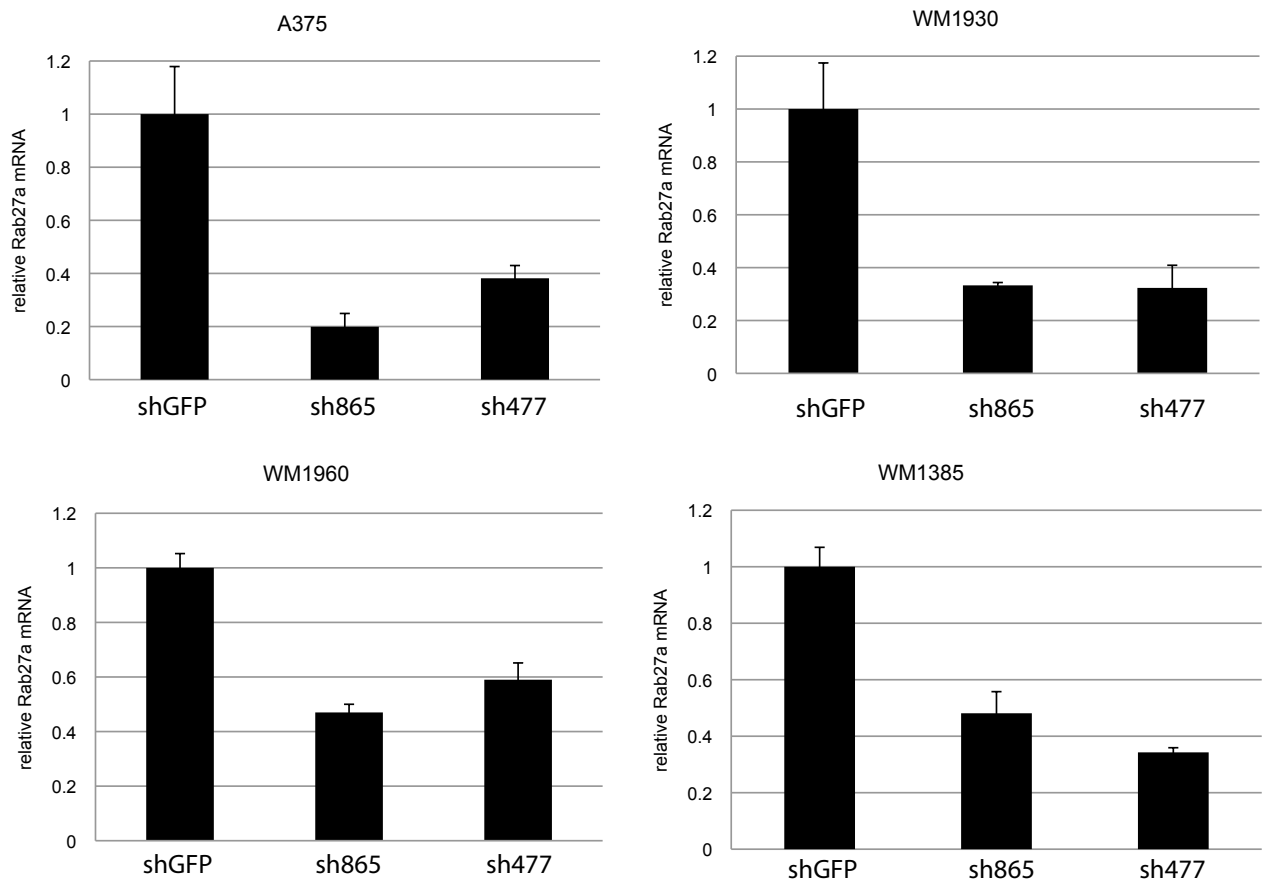

B

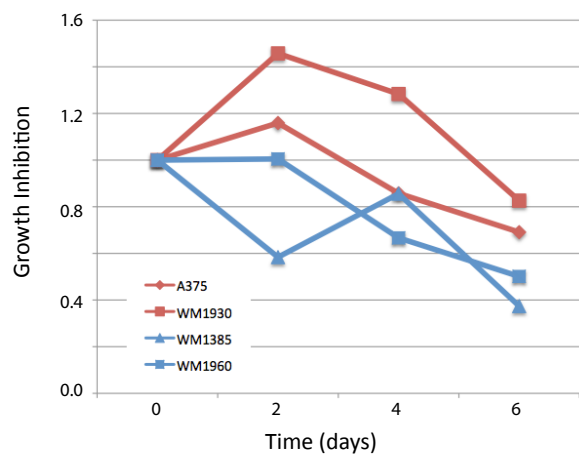

C

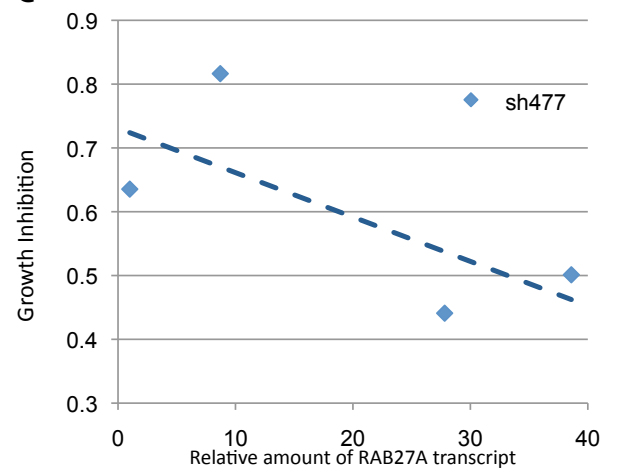

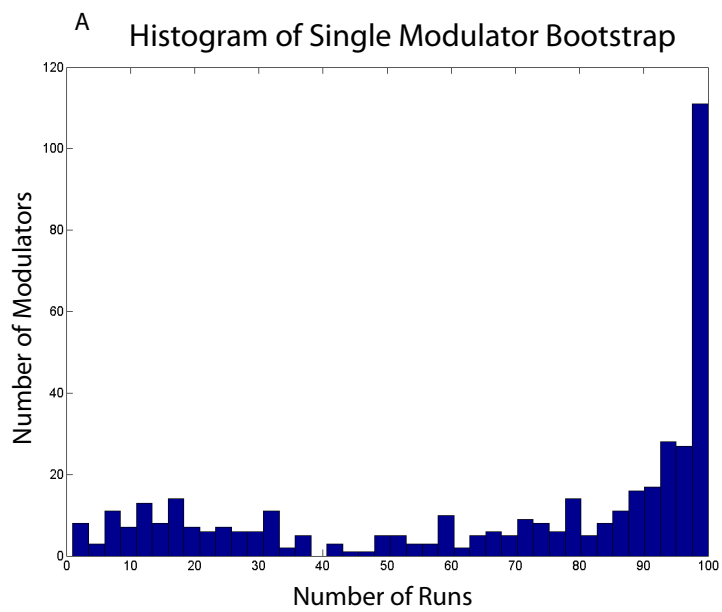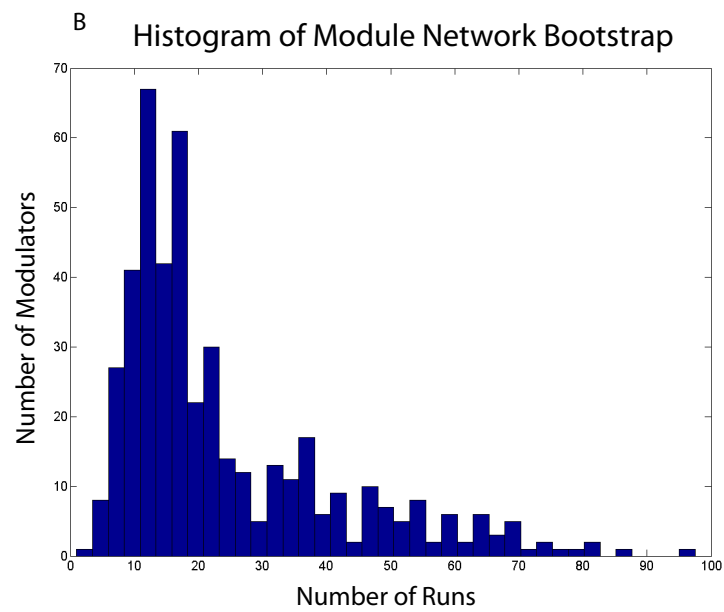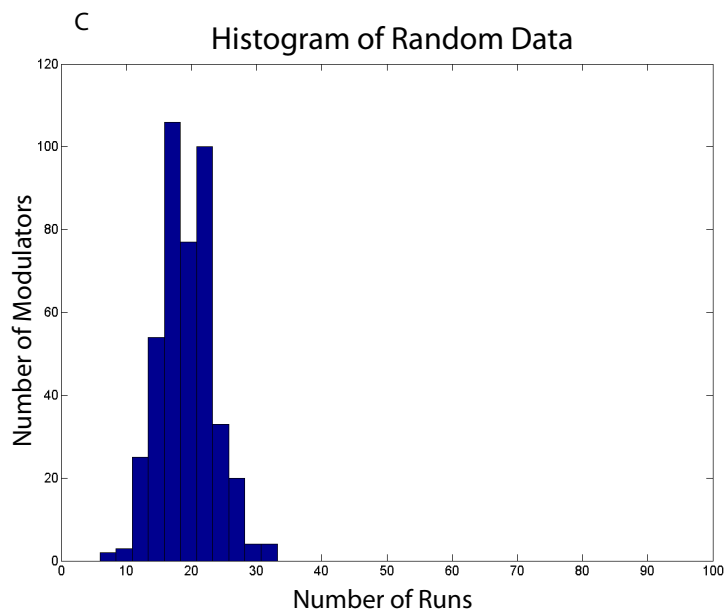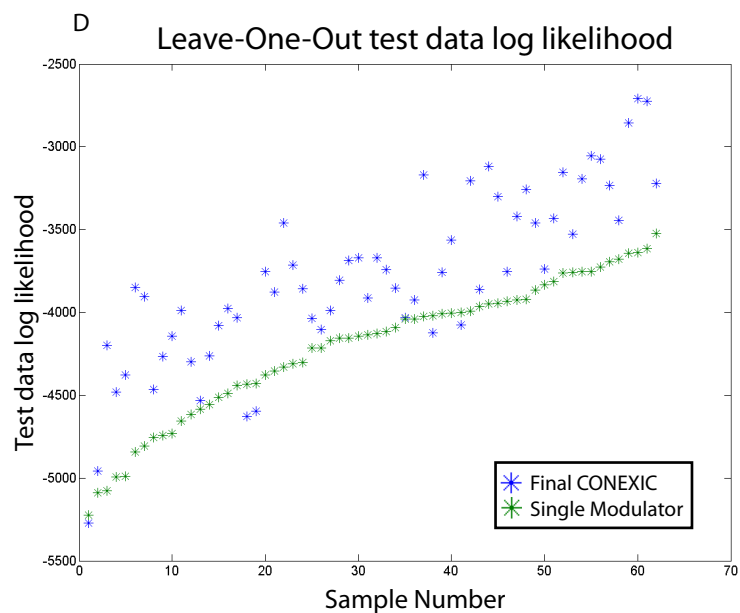

# Supplemental Figure 7

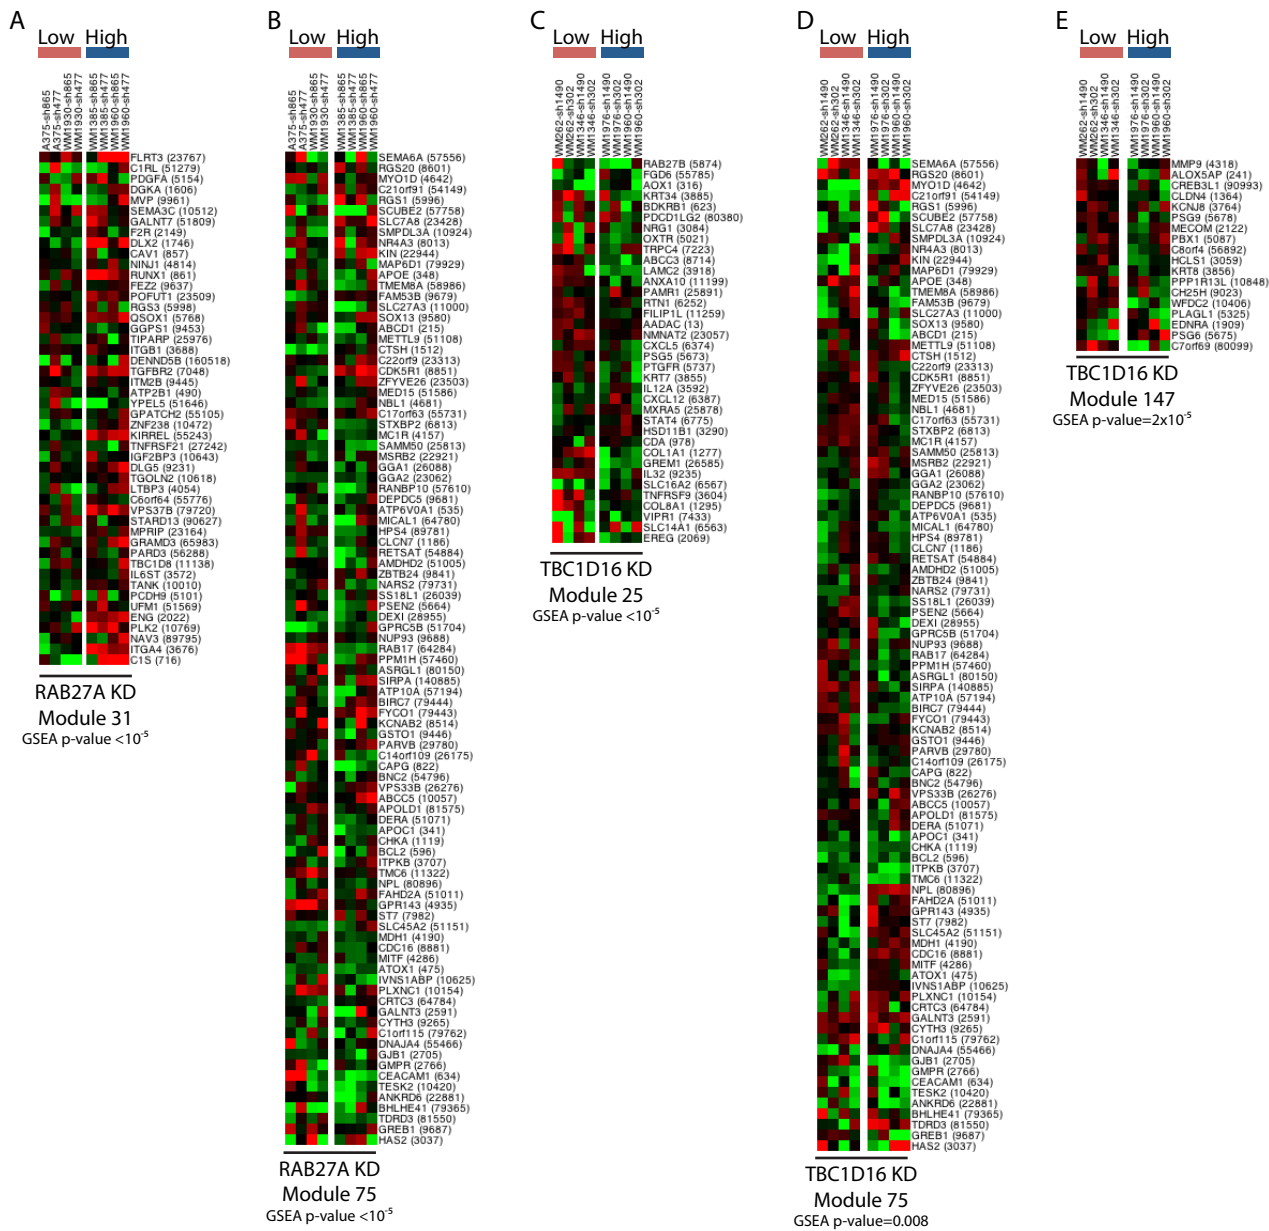

Supplement: NIHMS257440-supplement-04.pdf [file NIHMS257440-supplement-04.pdf]
